# Supplementary material for: CT-Based Radiomic Nomogram for Preoperative Prediction of Ki-67 in Lung Neuroendocrine Neoplasms: A Multicenter Study
Source: Research Square preprint supplement (doi:10.21203/rs.3.rs-7705743/v1), 2025-10-22
Supplement: Supplementary file 1 [file a0bfec01482b3bbddbe31965.docx]

**CT-Based Radiomic Nomogram for Preoperative Prediction of Ki-67 in Lung Neuroendocrine Neoplasms: A Multicenter Study**

Table S CT scanning parameters for each hospital participating in the study.

|  | **Center 1** | | | | | **Center 2** | | **Center 3** | | **Center 4** |
| --- | --- | --- | --- | --- | --- | --- | --- | --- | --- | --- |
| Manufacturer | GE Revolution 256 | GE Light Speed 64 | Siemes Somatom Force | Siemes Somatom PerPective 64 | Siemes Somatom Definition Flash | Siemens Sensation 64 | Philips CT 256 | Siemens Somatom Definition Flash | GE Medical System Optima | GE Medical Systems Revolution |
| Tube voltage (kV) | 120 | 120 | 120 | 120 | 120 | 120 | 120 | 120 | 120 | 120 |
| Tube current(mA) | 100-250 | 100-200 | 100-300 | 100-300 | Auto | 200-400 | 100-200 | Auto | 100-250 | 100-300 |
| Matrix | 512×512 | 512×512 | 512×512 | 512×512 | 512×512 | 512×512 | 512×512 | 512×512 | 512×512 | 512×512 |
| Slice thickness (mm) | 0.625 | 1 | 5 | 5 | 3 | 5 | 1 | 1 | 1 | 5 |
| Reconstructed slice thickness | 1 | 1 | 1 | 1 | 1 | 1 | 1 | 1 | 1 | 1 |

**CT protocol**

Lung images are reconstructed using a high spatial frequency algorithm. The patient is positioned supine, and the scan range extends from the thoracic inlet to below the diaphragm, covering the entire lung. The scan is performed at the end of deep inspiration breath-hold, starting with a plain scan followed immediately by an enhanced scan. A bolus of non-ionic contrast agent (300 mgI/mL) is injected via a high-pressure injector through the elbow vein or the dorsal hand vein, at a dosage of 1-1.5 mL/kg. The scanning process includes an arterial phase (25-30 seconds) and a venous phase (55-60 seconds). After scanning, the raw data are uploaded to the post-processing workstation for multiplanar reconstruction.
